# Supplementary material
Source: PubMed Central journal article supplement (PMC2746786)

## Supplementary Methods

The behavior of the single-neuron  $HVC_{RA}$  model in response to depolarizing and hyperpolarizing current pulses is shown in Fig. S1A-C (cf. Kubota and Taniguchi 1998, Fig. 2A1,C,D). The behavior of the  $HVC_I$  model is shown in Fig. S1D-F (cf. Kubota and Taniguchi 1998, Fig. 3A,C,D; and Dutar et al. 1998, Fig. 1C).

In the simulations shown in Fig. S1, we divided the injected current by an assumed effective membrane surface area. We adjusted the effective membrane surface area solely to adjust the input resistance and thereby scale the frequency-current relationships in this supplementary figure to match the data of Kubota and Taniguchi (1998). These effective membrane surface areas are not based on experimental data; however, they did not play a role in our network simulations because we expressed all ionic currents per unit surface area and adjusted maximal synaptic conductances to achieve the desired network behavior. In other words, a decrease in surface area can be compensated by an increase in synaptic strength, and vice versa. We assumed an effective membrane surface area of  $2400 \mu\text{m}^2$  for the  $HVC_{RA}$  neuron and  $12500 \mu\text{m}^2$  for the  $HVC_I$  neuron in this figure.

## Supplementary Results

In Fig. S3A, we demonstrate bistability in a 3- $HVC_{RA}$  reduced cluster model without an  $HVC_I$  neuron and with  $g_{AMPA} = 1.2 \text{ mS/cm}^2$ . In the absence of input, the cluster will remain in its quiescent state indefinitely. By exciting  $HVC_{RA}$  neuron 1 of the cluster with a 3 ms,  $50 \mu\text{A/cm}^2$

DC current pulse beginning at  $t = 10$  ms (green arrow), we shift the cluster into its persistently spiking state. We then shift the cluster back into its quiescent state with a 3 ms,  $-50 \mu\text{A}/\text{cm}^2$  current pulse into the same neuron beginning at  $t = 110$  ms (red arrow).

In our model, each  $\text{HVC}_{\text{RA}}$  neuron sends an excitatory synapse to, and receives an inhibitory synapse from, the  $\text{HVC}_{\text{I}}$  neuron (Fig. 3A). In Fig. S3B, we show the behavior of neurons in a cluster with  $g_{\text{AMPA}} = 1.2$  for  $\text{HVC}_{\text{RA}} \rightarrow \text{HVC}_{\text{RA}}$  synapses,  $g_{\text{AMPA}} = 0.1$  for  $\text{HVC}_{\text{RA}} \rightarrow \text{HVC}_{\text{I}}$  synapses, and  $g_{\text{GABAA}} = 0.8$  for  $\text{HVC}_{\text{I}} \rightarrow \text{HVC}_{\text{RA}}$  synapses. We again excite neuron 1 with a 3 ms,  $50 \mu\text{A}/\text{cm}^2$  current pulse beginning at  $t = 5$  ms. The stimulated neuron (Fig. S3B, top; blue trace) then excites the other two  $\text{HVC}_{\text{RA}}$  neurons (Fig. S3B, top; green and red traces) and the  $\text{HVC}_{\text{I}}$  neuron (Fig. S3B, bottom). The  $\text{HVC}_{\text{I}}$  neuron in turn terminates the activity of the  $\text{HVC}_{\text{RA}}$  neurons after each spikes 2 to 4 times, in  $6.8 \pm 2.1$  ms.

## Supplementary Figure Legends

FIG. S1. Intrinsic properties of  $\text{HVC}_{\text{RA}}$  and  $\text{HVC}_{\text{I}}$  model neurons at  $32^\circ\text{C}$ . *A*: Plots of spiking frequency vs. time at different current amplitudes for our model  $\text{HVC}_{\text{RA}}$  neuron (cf. Kubota and Taniguchi 1998, Fig. 2D). *B*: Response of the  $\text{HVC}_{\text{RA}}$  neuron to a 300 ms, 0.09 nA depolarizing current pulse (cf. Kubota and Taniguchi 1998, Fig. 2C). *C*: Response of the  $\text{HVC}_{\text{RA}}$  neuron to a 300 ms, -0.06 nA hyperpolarizing current pulse (cf. Kubota and Taniguchi 1998, Fig. 2A1). *D*: Plots of spiking frequency vs. time at different current amplitudes for our model  $\text{HVC}_{\text{I}}$  neuron (cf. Kubota and Taniguchi 1998, Fig. 3D). *E*: Response of the  $\text{HVC}_{\text{I}}$  neuron to a 300 ms, 0.70 nA

depolarizing pulse (*top*) (cf. Kubota and Taniguchi 1998, Fig. 3C and Dutar et al. 1998, Fig. 1C1). *F*: Response of the HVC<sub>I</sub> neuron to a 300 ms, -0.50 nA hyperpolarizing pulse (*bottom*) (cf. Kubota and Taniguchi 1998, Fig. 3A and Dutar et al. 1998, Fig. 1C2).

FIG. S2. Burst duration for the inhibitory pause mechanism of Fig. 1C as a function of various parameters. *Dark gray lines*: mean  $\pm$  SD. *Light gray regions*: HVC<sub>RA</sub> burst duration (mean  $\pm$  SD) measured by Kozhevnikov and Fee (2007). Note that this mechanism is less sensitive to parameter changes than the inhibitory buildup mechanism is (cf. Fig. 2). *A*: Inhibitory synaptic decay time constant,  $1/\beta$  (normal value: 5.6 ms). *B*: Inhibitory synapses per HVC<sub>I</sub>, normal adaptation currents present (normal number: 70). *C*: Scale factor by which the maximal conductances of both adaptation currents are multiplied (normal value: 1). *D*: Inhibitory synapses per HVC<sub>I</sub>, adaptation currents absent. *E*: Excitatory synapses per HVC<sub>RA</sub> (normal number: 80).

FIG. S3. *A*: Bistability of the 3-HVC<sub>RA</sub> reduced cluster model without an HVC<sub>I</sub> neuron. *Green arrow*: time of excitatory current pulse. *Red arrow*: time of inhibitory current pulse. *B*: When the HVC<sub>I</sub>  $\rightarrow$  HVC<sub>RA</sub> synapses are of an appropriate strength, the HVC<sub>RA</sub> neurons show a brief burst of activity. *Top*: Response of a cluster of three HVC<sub>RA</sub> neurons to a 3 ms, 50  $\mu$ A/cm<sup>2</sup> current pulse injected into HVC<sub>RA1</sub> (*blue trace*), beginning at  $t = 5$  ms. When HVC<sub>RA1</sub> is excited, it excites HVC<sub>RA2</sub>, (*green*), HVC<sub>RA3</sub> (*red*), and HVC<sub>I</sub> (*bottom*). The HVC<sub>I</sub> neuron terminates the spiking of the HVC<sub>RA</sub> neurons.

FIG. S4. Raster plot of the spike times in a chain of 20 clusters with physiological synaptic strengths. This plot illustrates the propagation of activity along the  $HVC_{RA}$  network, the consistency of burst duration, and the sustained activity of  $HVC_I$  neurons. A cluster contains 80  $HVC_{RA}$  neurons, each of which sends a single AMPA synapse to each of 40 other  $HVC_{RA}$  neurons in its cluster, 40 in the previous cluster, and 40 in the next cluster. Each of the 1600  $HVC_I$  neurons receives an AMPA synapse from each of 20  $HVC_{RA}$  neurons and sends a  $GABA_A$  synapse to each of 80  $HVC_{RA}$  neurons, and is constrained not to send inhibition within 10 clusters downstream, or 1 cluster upstream, of one from which it receives excitation. We initiated spiking in the first cluster with a 4 ms,  $40 \mu A/cm^2$  DC current pulse in 50% of the  $HVC_{RA}$  neurons, beginning at  $t = 0$  ms.

FIG. S5. Blocking  $GABA_A$  receptors reduces the sparseness of  $HVC_{RA}$  bursting. Raster plot of spike times of a subset of  $HVC_{RA}$  and  $HVC_I$  neurons from a simulation of 90  $HVC_I$  neurons and 60 clusters of 3  $HVC_{RA}$  neurons, in which the inhibitory maximal conductance,  $g_{GABAA}$ , was set to zero. Each  $HVC_{RA}$  burst began normally but failed to terminate, thus showing persistent activity. We set the threshold for determining spike time at -30 mV to catch low-amplitude spikes in the  $HVC_I$  neurons.

FIG. S1

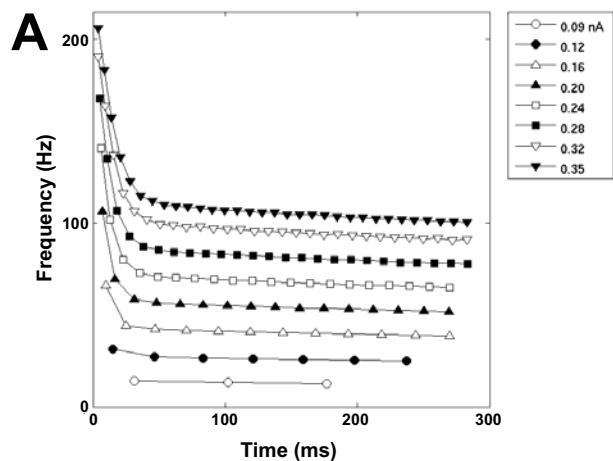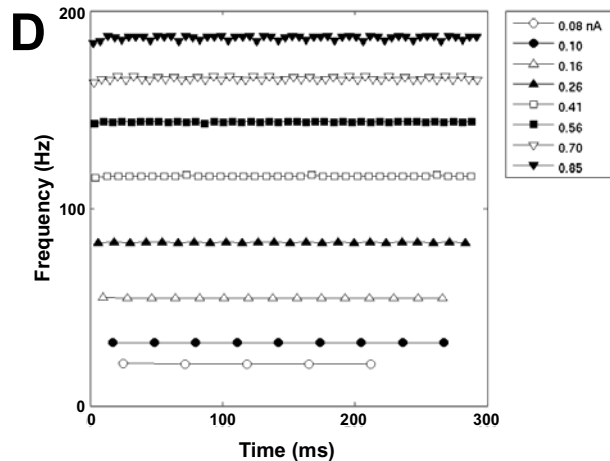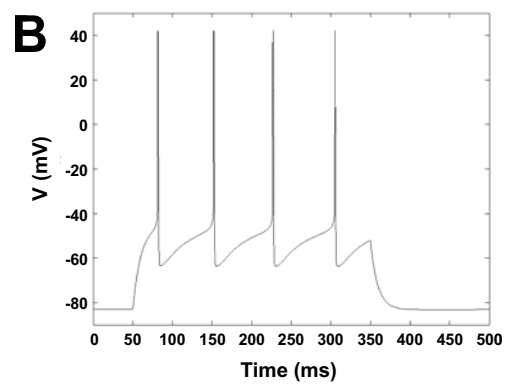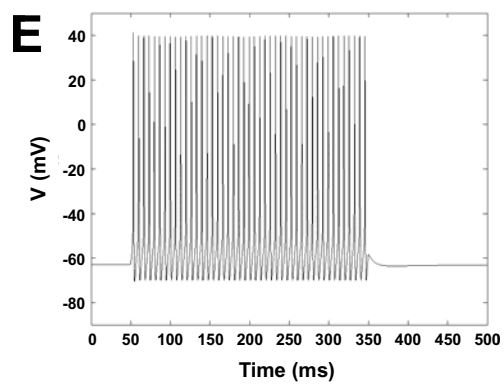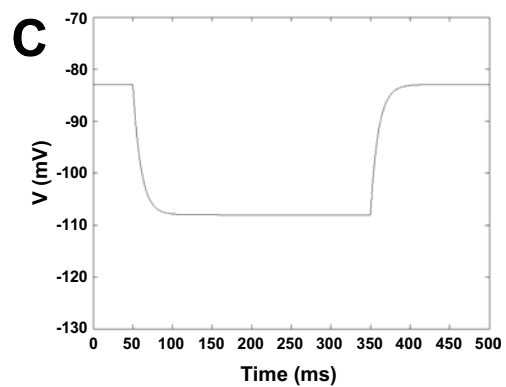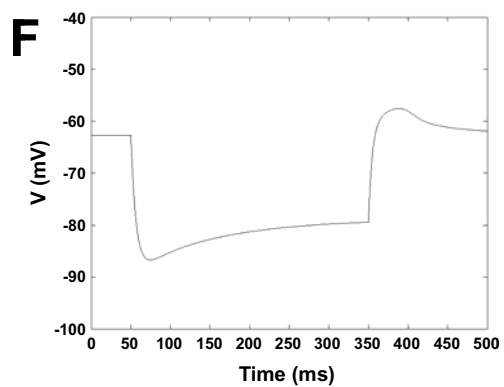

FIG. S2

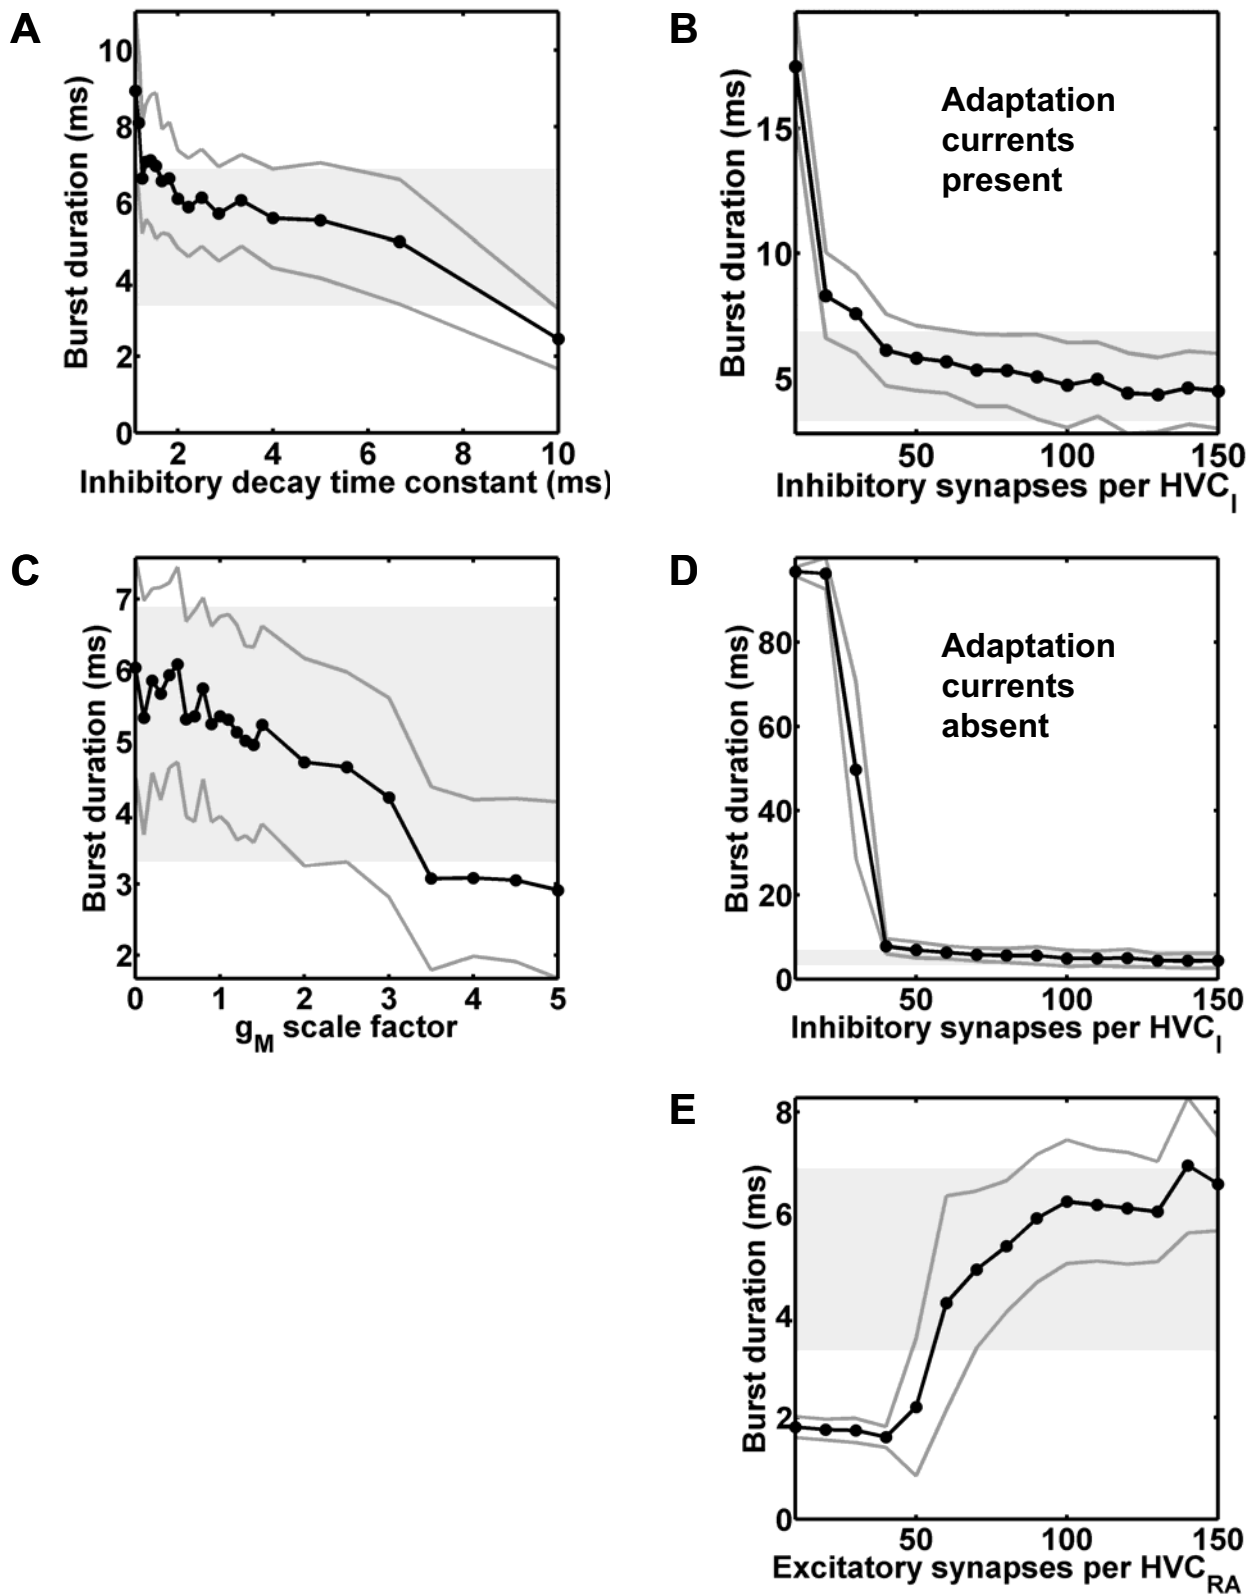

FIG. S3

### 3-HVC<sub>RA</sub> cluster:

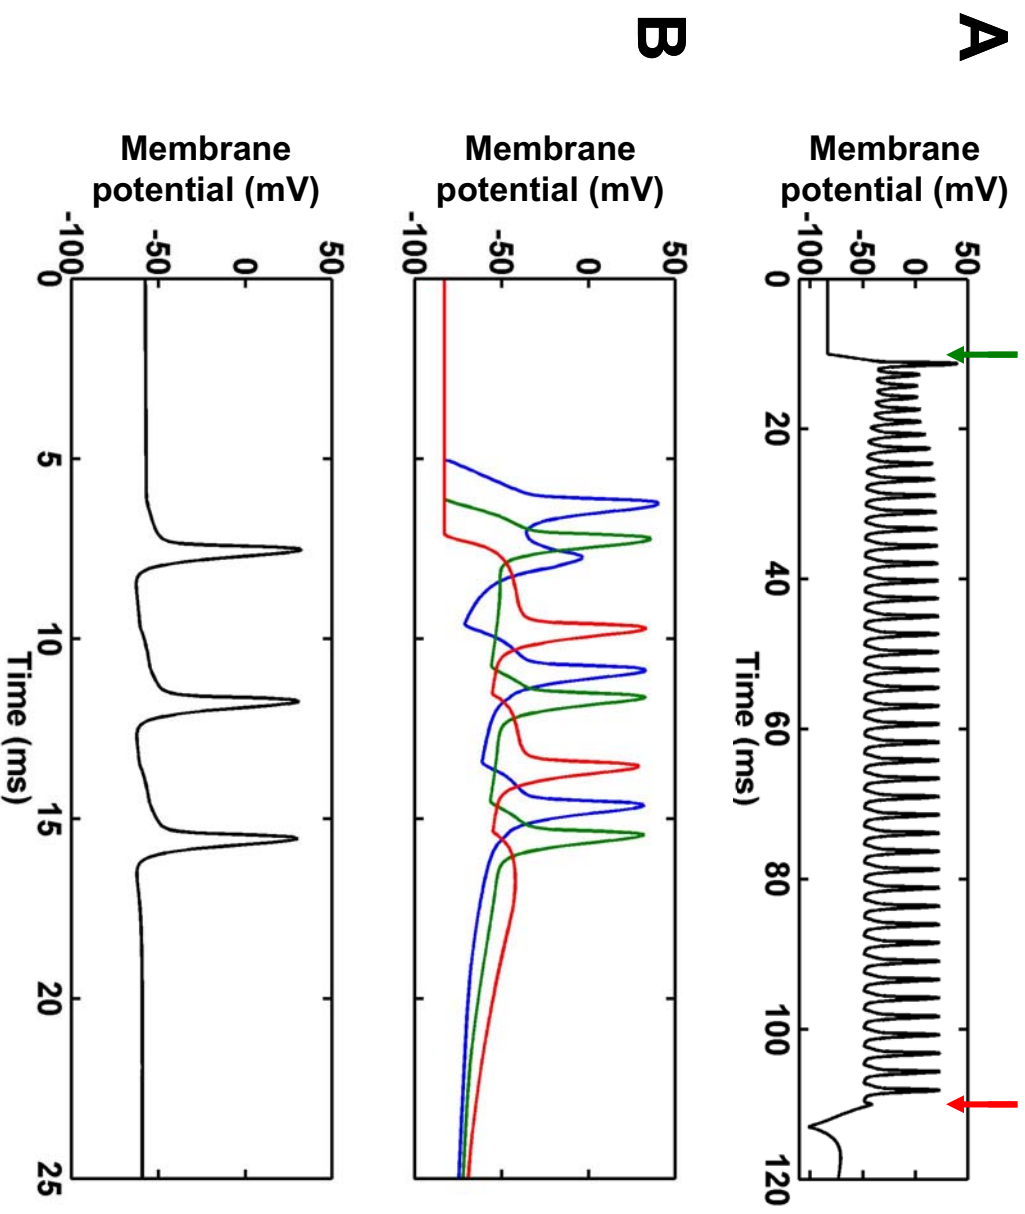

FIG. S4

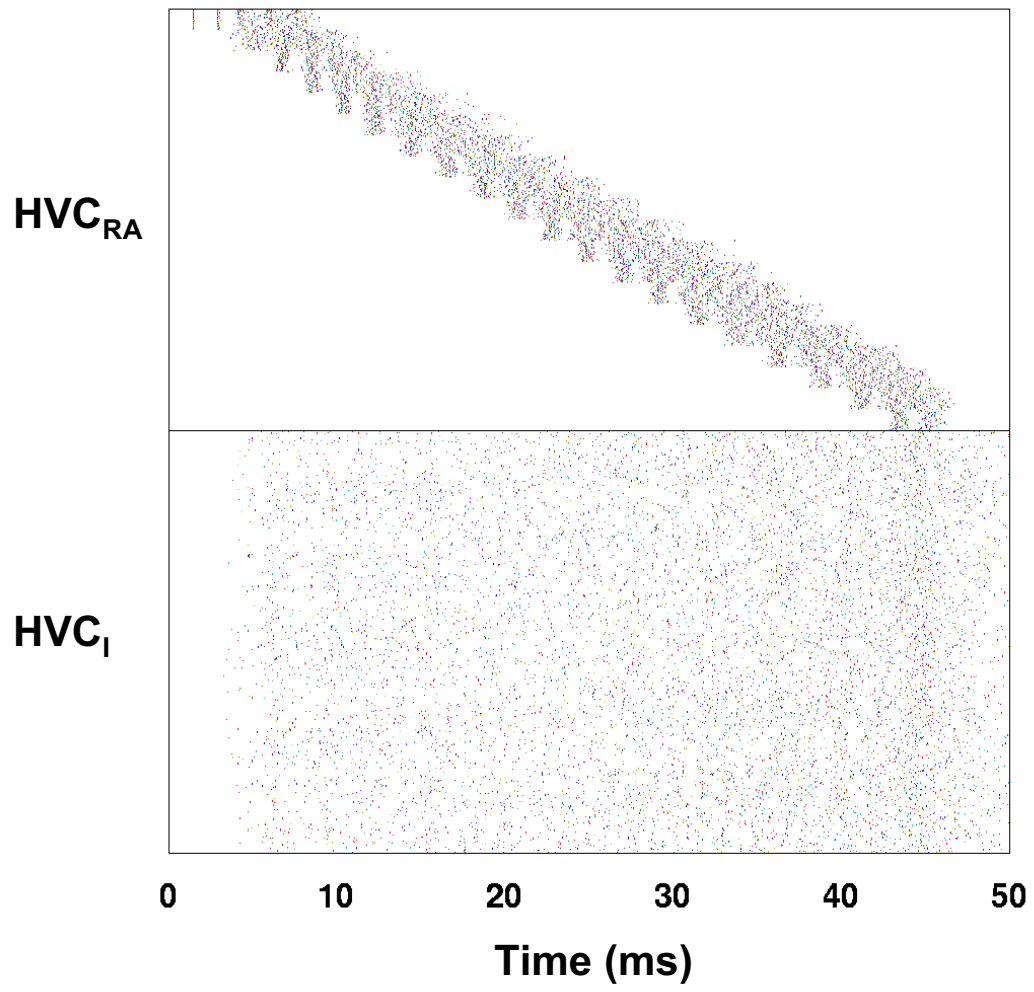



FIG. S5

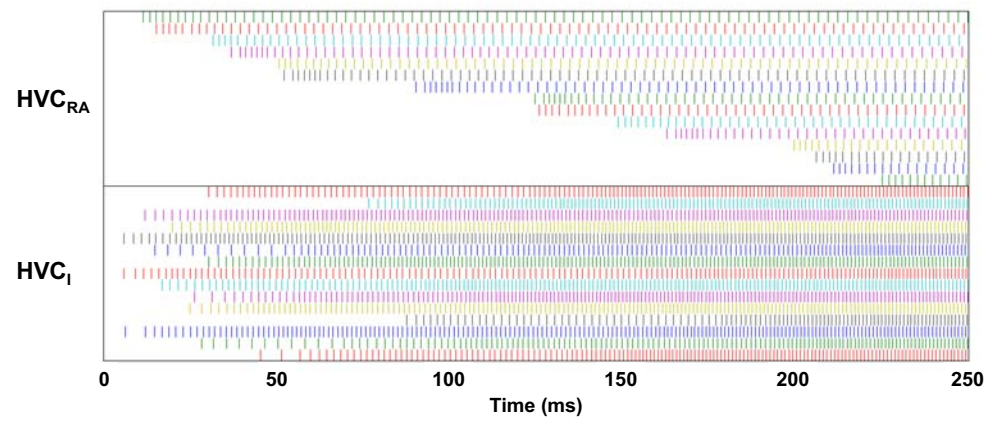

Supplement: 00670.2007_1.pdf [file 00670.2007_1.pdf]
